# Supplementary material
Source: PubMed Central journal article supplement (PMC3717559)
Supplement: NIHMS341770-supplement-supplement_1.pdf [file NIHMS341770-supplement-supplement_1.pdf]

**Supplement: Table 3. Percent Ratio of D<sub>50</sub> Organ Dose/Prescribed TMI Dose**

| <b>Organs</b>   | <b>n</b> | <b>Mean</b> | <b>Range</b> |
|-----------------|----------|-------------|--------------|
| Lens            | 22       | 15          | 11-26        |
| Oral Cavity     | 22       | 20          | 12-26        |
| Thyroid         | 22       | 37          | 23-47        |
| Stomach         | 22       | 38          | 30-46        |
| Parotid         | 22       | 39          | 28-51        |
| Rectum          | 22       | 40          | 34-46        |
| Esophagus       | 22       | 40          | 35-47        |
| Small Intestine | 22       | 41          | 37-45        |
| Lungs           | 22       | 46          | 37-56        |
| Heart           | 22       | 49          | 43-55        |
| Eyes            | 22       | 50          | 40-54        |
| Testis          | 12       | 51          | 41-61        |
| Optic Nerve     | 22       | 51          | 39-55        |
| Ovary           | 10       | 52          | 43-66        |
| Brain           | 22       | 54          | 39-73        |
| Kidneys         | 22       | 59          | 56-64        |
| Liver           | 22       | 61          | 55-81        |
| Bladder         | 22       | 63          | 43-73        |
| Breasts         | 10       | 69          | 61-76        |
